# Supplementary material
Source: PubMed Central journal article supplement (PMC8077034)
Supplement: NIHMS1687273-supplement-Supplement.pdf [file NIHMS1687273-supplement-Supplement.pdf]

# Post-Operative Biomarkers and Risk of Chronic Kidney Disease After Cardiac Surgery: the TRIBE-AKI Study

## SUPPLEMENTAL MATERIAL

Steven Menez, MD, MHS<sup>1</sup>; Dennis G. Moledina, MBBS, PhD<sup>2,3</sup>; Amit X. Garg, MD, PhD<sup>4,5,6</sup>;  
Heather Thiessen-Philbrook, MMath<sup>1</sup>; Eric McArthur, MSc<sup>6</sup>; Yaqi Jia, MPH<sup>1</sup>; Caroline Liu, MHS<sup>1</sup>;  
Wassim Obeid, PhD<sup>1</sup>; Sherry G. Mansour, DO, MS<sup>2,3</sup>; Jay L. Koyner, MD<sup>7</sup>; Michael G. Shlipak,  
MD, MPH<sup>8</sup>; Francis P. Wilson, MD, MSCE<sup>2,3</sup>; Steven G. Coca, DO, MS<sup>9</sup>; Chirag R. Parikh, MD,  
PhD<sup>1</sup>

## CONTENTS

|                                                                                                                                                     |    |
|-----------------------------------------------------------------------------------------------------------------------------------------------------|----|
| <b>Table S1:</b> Comparison of Baseline Demographics in Patients with Vs. without<br>Follow-up Serum Creatinine Measurements .....                  | 2  |
| <b>Table S2:</b> Risk of CKD Incidence or Progression by Post-operative Biomarker Tertiles.....                                                     | 3  |
| <b>Table S3:</b> Risk of CKD Incidence or Progression by Post-operative Biomarker<br>Level, Adjusted for Pre-operative Level.....                   | 4  |
| <b>Table S4:</b> Baseline Demographics, Replication Cohort.....                                                                                     | 5  |
| <b>Table S5:</b> Risk of CKD Incidence or Progression by Post-operative Biomarker Level,<br>Replication Cohort .....                                | 6  |
| <b>Table S6:</b> Risk of CKD Incidence or Progression by Post-operative Biomarker<br>Level Using Sub-distribution Hazard Model, Primary Cohort..... | 7  |
| <b>Table S7.</b> Evaluation for Interactions Between Biomarker Level and Pre-Operative<br>CKD on the Risk of CKD Incidence or Progression .....     | 8  |
| <b>Table S8.</b> Model Performance using Net Reclassification Index .....                                                                           | 9  |
| <b>Table S9:</b> Risk of CKD Incidence or Progression by Peak Biomarker Level, Primary Cohort ....                                                  | 10 |
| <b>Table S10:</b> Risk of CKD Incidence or Progression by Mean Biomarker Level, Primary Cohort.                                                     | 11 |
| <b>Table S11:</b> Biomarker Measurement Details.....                                                                                                | 12 |
| <b>Figure S1:</b> Post-operative biomarker spline plots using 3 cubic spline knots .....                                                            | 13 |

**Table S1: Comparison of Baseline Demographics in Patients with Vs. without Follow-up Serum Creatinine Measurements**

| Label                                                            | Value | ALL<br>(N=753) | SCr not<br>available<br>(N=140) | SCr available<br>(N=613) | P**   |
|------------------------------------------------------------------|-------|----------------|---------------------------------|--------------------------|-------|
| Age at the time of surgery                                       |       | 71.52 (9)      | 71.52 (9.77)                    | 71.52 (8.82)             | 0.559 |
| Sex                                                              | F     | 204 (27%)      | 36 (26%)                        | 168 (27%)                | 0.684 |
|                                                                  | M     | 549 (73%)      | 104 (74%)                       | 445 (73%)                |       |
| Diabetes (yes/no)                                                | No    | 435 (58%)      | 78 (56%)                        | 357 (58%)                | 0.585 |
|                                                                  | Yes   | 318 (42%)      | 62 (44%)                        | 256 (42%)                |       |
| Ejection fraction <35% or grade 3 or 4 left ventricular function | No    | 687 (91%)      | 122 (87%)                       | 565 (92%)                | 0.058 |
|                                                                  | Yes   | 66 (9%)        | 18 (13%)                        | 48 (8%)                  |       |
| Myocardial Infarction                                            | No    | 542 (72%)      | 102 (73%)                       | 440 (72%)                | 0.798 |
|                                                                  | Yes   | 211 (28%)      | 38 (27%)                        | 173 (28%)                |       |
| Pre-Op Serum Creatinine #1 (last level drawn before time zero)   |       | 1.03 (0.31)    | 1.04 (0.28)                     | 1.03 (0.31)              | 0.481 |
| CKD-EPI GFR Pre-op                                               |       | 70.97 (18.28)  | 70.84 (18.55)                   | 71 (18.23)               | 0.958 |
| Pre-op CKD Stages (based on CKD-EPI egfr)                        | 1     | 111 (15%)      | 19 (14%)                        | 92 (15%)                 | 0.919 |
|                                                                  | 2     | 439 (58%)      | 83 (59%)                        | 356 (58%)                |       |
|                                                                  | 3     | 188 (25%)      | 36 (26%)                        | 152 (25%)                |       |
|                                                                  | 4/5   | 15 (2%)        | 2 (1%)                          | 13 (2%)                  |       |
| Congestive Heart Failure                                         | No    | 680 (90%)      | 129 (92%)                       | 551 (90%)                | 0.415 |
|                                                                  | Yes   | 73 (10%)       | 11 (8%)                         | 62 (10%)                 |       |
| Perfusion Time                                                   |       | 108.05 (58.12) | 112.31 (59.16)                  | 107.09 (57.89)           | 0.490 |
| Cross Clamp time (min)                                           |       | 71.77 (43.48)  | 72.74 (42.04)                   | 71.55 (43.84)            | 0.741 |
| Length of ICU stay (days)                                        |       | 3.34 (9.85)    | 4.56 (10.68)                    | 3.06 (9.63)              | 0.321 |
| Length of hospital stay (days)                                   |       | 9.99 (13.26)   | 10.75 (14.78)                   | 9.82 (12.89)             | 0.057 |

Mean (SD) and frequency (%) are presented for the continuous and categorical variables, respectively

**Table S2: Risk of CKD Incidence or Progression by Post-operative Biomarker Tertiles**

| <b>Biomarker</b>               | <b>Tertile (range)</b>     | <b>N</b> | <b>Event Rate<br/>(per 1000<br/>person-<br/>years)</b> | <b>Unadjusted HR<br/>(95% CI)</b> | <b>Adjusted HR<br/>(95% CI)</b> |
|--------------------------------|----------------------------|----------|--------------------------------------------------------|-----------------------------------|---------------------------------|
| <b>bFGF<br/>(pg/mL)</b>        | 1st Tertile (1.37-5.97)    | 206      | 37.1                                                   | 1 (ref)                           | 1 (ref)                         |
|                                | 2nd Tertile (5.98-9.85)    | 202      | 51.9                                                   | 1.40 (0.94, 2.08)                 | 1.32 (0.87, 1.99)               |
|                                | 3rd Tertile (9.90-121.8)   | 204      | 72.2                                                   | 1.99 (1.36, 2.91)                 | 1.89 (1.26, 2.82)               |
| <b>KIM-1<br/>(pg/mL)</b>       | 1st Tertile (78.4-177.0)   | 204      | 39.4                                                   | 1 (ref)                           | 1 (ref)                         |
|                                | 2nd Tertile (177.2-238.2)  | 204      | 60.0                                                   | 1.53 (1.05, 2.25)                 | 1.42 (0.96, 2.11)               |
|                                | 3rd Tertile (238.6-6849.8) | 204      | 60.3                                                   | 1.55 (1.06, 2.29)                 | 1.29 (0.85, 1.97)               |
| <b>NT pro-BNP<br/>(pmol/L)</b> | 1st Tertile (2.0-28.5)     | 129      | 41.3                                                   | 1 (ref)                           | 1 (ref)                         |
|                                | 2nd Tertile (28.7-80.7)    | 129      | 56.9                                                   | 1.39 (0.87, 2.21)                 | 1.35 (0.83, 2.20)               |
|                                | 3rd Tertile (81.5-2684.0)  | 129      | 73.6                                                   | 1.81 (1.16, 2.83)                 | 1.56 (0.95, 2.58)               |
| <b>TNF-r1<br/>(pg/mL)</b>      | 1st Tertile (1779-5403)    | 204      | 44.0                                                   | 1 (ref)                           | 1 (ref)                         |
|                                | 2nd Tertile (5409-7922)    | 204      | 49.4                                                   | 1.14 (0.77, 1.68)                 | 1.12 (0.75, 1.67)               |
|                                | 3rd Tertile (7932-23596)   | 204      | 66.7                                                   | 1.53 (1.06, 2.21)                 | 1.41 (0.94, 2.12)               |

\* Adjusted for age, sex, AKI stage, pre-operative albuminuria, pre-operative serum creatinine, discharge serum creatinine

**Table S3: Risk of CKD Incidence or Progression by Post-operative Biomarker Level, Adjusted for Pre-operative Level**

| <b>Biomarkers<br/>(natural log-<br/>transformed)</b> | <b>Adjusted Hazard Ratio (95% CI)*</b> |
|------------------------------------------------------|----------------------------------------|
| bFGF                                                 | 1.56 (1.21, 2.00)                      |
| KIM-1                                                | 0.81 (0.36, 1.83)                      |
| Pro-BNP                                              | 1.21 (0.81, 1.80)                      |
| TNF-r1                                               | 1.45 (0.96, 2.21)                      |

n=613

\*adjusted for age, sex, AKI stage, pre-operative albuminuria, pre-operative serum creatinine, discharge serum creatinine

**Table S4: Baseline Demographics, Replication Cohort**

| <u>Variable</u>                              | <b>ALL</b>     |                           |                                  | <b>P-value</b> |
|----------------------------------------------|----------------|---------------------------|----------------------------------|----------------|
|                                              |                | <b>No primary outcome</b> | <b>Developed primary outcome</b> |                |
|                                              | (N=310)        | (N=191)                   | (N=119)                          |                |
| Age at the time of surgery                   | 71.97 (9.63)   | 72.23 (10.05)             | 71.55 (8.94)                     | 0.36           |
| Sex (female, %)                              | 101 (33%)      | 63 (33%)                  | 38 (32%)                         | 0.85           |
| Race (white, %)                              | 301 (97%)      | 185 (97%)                 | 116 (97%)                        | 0.75           |
| Diabetes                                     | 111 (36%)      | 56 (29%)                  | 55 (46%)                         | 0.003          |
| Hypertension                                 | 242 (78%)      | 149 (78%)                 | 93 (78%)                         | 0.98           |
| Congestive Heart Failure                     | 59 (19%)       | 31 (16%)                  | 28 (24%)                         | 0.11           |
| Left ventricular ejection fraction <40%      | 26 (8%)        | 14 (7%)                   | 12 (10%)                         | 0.40           |
| Previous myocardial infarction               | 61 (21%)       | 28 (15%)                  | 33 (29%)                         | 0.004          |
| eGFR, mL/min per 1.73m <sup>2</sup>          | 65.75 (17.84)  | 65.4 (18.7)               | 66.33 (16.41)                    | 0.43           |
| eGFR, mL/min per 1.73m <sup>2</sup>          | >60            | 188 (61%)                 | 107 (56%)                        | 0.11           |
|                                              | <60            | 122 (39%)                 | 84 (44%)                         |                |
| Serum creatinine, mg/dL                      | 1.09 (0.29)    | 1.1 (0.29)                | 1.09 (0.3)                       | 0.58           |
| Urine Microalbumin, pre-operative (>30 mg/g) | 76.05 (190.29) | 65.84 (166.15)            | 94.22 (226.84)                   | 0.047          |
| STS Score                                    | 9.64 (3.68)    | 9.47 (3.61)               | 9.92 (3.8)                       | 0.19           |
| Elective surgery                             | 269 (87%)      | 167 (87%)                 | 102 (86%)                        | 0.66           |
| Isolated CABG or valve surgery               | 236 (76%)      | 146 (76%)                 | 90 (76%)                         | 0.87           |
| Off-pump                                     | 40 (13%)       | 21 (11%)                  | 19 (16%)                         | 0.19           |
| Reoperation                                  | 0 (0%)         | NA                        | NA                               | NA             |
| Perfusion time, min                          | 110.07 (46.76) | 113.43 (44.76)            | 104.56 (49.58)                   | 0.10           |
| Crossclamp time, min                         | 84.34 (36.8)   | 85.78 (34.03)             | 81.95 (41.04)                    | 0.22           |
| AKIN Stage                                   | 0              | 228 (74%)                 | 146 (76%)                        | 0.54           |
|                                              | 1              | 78 (25%)                  | 43 (23%)                         |                |
|                                              | 2 or 3         | 4 (2%)                    | 2 (1%)                           |                |
| AKI Duration (days)                          | 1 to 2         | 228 (74%)                 | 146 (76%)                        | 0.54           |
|                                              | 3 to 6         | 78 (25%)                  | 43 (23%)                         |                |
|                                              | >6             | 4 (1%)                    | 2 (1%)                           |                |
| Last serum Creatinine before discharge       | 1.03 (0.3)     | 1.02 (0.28)               | 1.05 (0.33)                      | 0.43           |

eGFR: estimated glomerular filtration rate. STS: Society of Thoracic Surgeons. CABG: coronary artery bypass graft.

AKI: acute kidney injury. AKIN: acute kidney injury network

CKD incidence (pre-operative eGFR ≥60): 25% reduction in eGFR and a fall below 60 mL/min/1.73m<sup>2</sup>

CKD progression (pre-operative eGFR <60):50% reduction in eGFR or a fall below 15 mL/min/1.73m<sup>2</sup>

- Mean (SD) and frequency (%) are presented for the continuous and categorical variables, respectively

**Table S5: Risk of CKD Incidence or Progression by Post-operative Biomarker Level, Replication Cohort**

| Biomarker              | Tertile (range)                         | Event Rate<br>(per 1000<br>person-years) | Unadjusted HR<br>(95% CI) | Adjusted HR<br>(95% CI) |
|------------------------|-----------------------------------------|------------------------------------------|---------------------------|-------------------------|
| bFGF (pg/mL)           | Continuous                              | N/A                                      | 1.25 (1.02, 1.53)         | 1.24 (1.00, 1.52)       |
|                        | 1 <sup>st</sup> Tertile (1.9-7.8)       | 40.2                                     | 1 (ref)                   | 1 (ref)                 |
|                        | 2 <sup>nd</sup> Tertile (8-19.9)        | 61.8                                     | 2.00 (1.15, 3.48)         | 1.86 (1.05, 3.29)       |
|                        | 3 <sup>rd</sup> Tertile (20.6-231.4)    | 55.2                                     | 2.00 (1.12, 3.6)          | 1.98 (1.09, 3.62)       |
| KIM-1 (pg/mL)          | Continuous                              | N/A                                      | 1.69 (1.18, 2.41)         | 1.51 (1.02, 2.23)       |
|                        | 1 <sup>st</sup> Tertile (125.4-163.69)  | 42.1                                     | 1 (ref)                   | 1 (ref)                 |
|                        | 2 <sup>nd</sup> Tertile (197.34-231.72) | 55.6                                     | 1.67 (0.94, 2.97)         | 1.56 (0.87, 2.79)       |
|                        | 3 <sup>rd</sup> Tertile (281.73-377.77) | 68.5                                     | 2.23 (1.28, 3.89)         | 2.03 (1.14, 3.61)       |
| NT pro-BNP<br>(pmol/L) | Continuous                              | N/A                                      | 1.32 (1.1, 1.6)           | 1.35 (1.07, 1.70)       |
|                        | 1 <sup>st</sup> Tertile (1.8-24)        | 40.5                                     | 1 (ref)                   | 1 (ref)                 |
|                        | 2 <sup>nd</sup> Tertile (24-89)         | 56.1                                     | 1.45 (0.79, 2.65)         | 1.53 (0.81, 2.86)       |
|                        | 3 <sup>rd</sup> Tertile (90-2287)       | 67.6                                     | 2.09 (1.13, 3.87)         | 2.09 (1.02, 4.28)       |
| TNF-r1<br>(pg/mL)      | Continuous                              | N/A                                      | 1.97 (1.18, 3.28)         | 1.73 (0.94, 3.18)       |
|                        | 1 <sup>st</sup> Tertile (1721-4400)     | 34.6                                     | 1 (ref)                   | 1 (ref)                 |
|                        | 2 <sup>nd</sup> Tertile (4405-6399)     | 62.0                                     | 2.04 (1.15, 3.60)         | 2.02 (1.12, 3.64)       |
|                        | 3 <sup>rd</sup> Tertile (6399-16817)    | 61.5                                     | 2.16 (1.21, 3.87)         | 1.95 (0.99, 3.82)       |

\* Adjusted for age, sex, AKI stage, pre-operative albuminuria, pre-operative serum creatinine, discharge serum creatinine

**Table S6: Risk of CKD Incidence or Progression by Post-operative Biomarker Level Using Sub-distribution Hazard Model, Primary Cohort**

| Biomarkers<br>(natural log-transformed) | Sub-distribution Hazard Ratio (95% CI) |                         |
|-----------------------------------------|----------------------------------------|-------------------------|
|                                         | Unadjusted HR<br>(95% CI)              | Adjusted HR<br>(95% CI) |
| bFGF                                    | 1.47 (1.18, 1.83)                      | 1.48 (1.16, 1.89) *     |
| NT pro-BNP                              | 1.17 (1.02, 1.34)                      | 1.17 (0.99, 1.37)       |
| TNF-r1                                  | 1.62 (1.16, 2.27)                      | 1.66 (1.12, 2.48) *     |
| IL-10                                   | 1.14 (1.01, 1.27)                      | 1.11 (0.98, 1.25)       |
| IL-2                                    | 1.15 (0.98, 1.34)                      | 1.06 (0.91, 1.25)       |
| KIM-1                                   | 1.42 (1.02, 1.98)                      | 1.41 (0.91, 2.19)       |
| VEGFr1                                  | 1.29 (1.06, 1.57)                      | 1.20 (0.96, 1.49)       |
| YKL-40                                  | 1.21 (0.98, 1.50)                      | 1.07 (0.85, 1.35)       |

n=613

\*  $p < 0.05$

Adjusted for age, sex, AKI stage, pre-operative albuminuria, pre-operative serum creatinine, discharge serum creatinine

**Table S7: Evaluation for Interactions Between Biomarker Level and Pre-Operative CKD on the Risk of CKD Incidence or Progression**

| Biomarker<br>(natural log-transformed) | Adjusted Hazard Ratio (95% CI) |                   |                     |
|----------------------------------------|--------------------------------|-------------------|---------------------|
|                                        | No baseline CKD                | Baseline CKD      | Interaction P-value |
| bFGF                                   | 1.79 (0.86, 3.71)              | 1.42 (1.10, 1.83) | 0.74                |
| KIM-1                                  | 1.70 (0.79, 3.70)              | 1.82 (1.18, 2.82) | 0.69                |
| NT pro-BNP                             | 1.83 (1.20, 2.81)              | 1.18 (0.97, 1.42) | 0.22                |
| TNFr1                                  | 6.58 (1.74, 24.95)             | 1.77 (1.18, 2.68) | 0.08                |

Adjusted for age, sex, AKI stage, pre-operative albuminuria, pre-operative serum creatinine, discharge serum creatinine



| <b>Table S8: Model Performance using Net Reclassification Index*</b> |               |                                                |               |                   |
|----------------------------------------------------------------------|---------------|------------------------------------------------|---------------|-------------------|
| <b>Biomarker</b>                                                     | <b>Cohort</b> | <b>Continuous NRI<br/>at 6 years follow-up</b> |               |                   |
|                                                                      |               | <b>Overall</b>                                 | <b>Events</b> | <b>Non Events</b> |
| Plasma bFGF                                                          | Primary       | 0.19                                           | 0.03          | 0.16              |
|                                                                      | Replication   | 0.19                                           | 0.08          | 0.11              |
| Plasma KIM-1                                                         | Primary       | 0.06                                           | -0.04         | 0.10              |
|                                                                      | Replication   | 0.06                                           | -0.23         | 0.29              |
| Plasma NT pro-BNP                                                    | Primary       | 0.21                                           | 0.00          | 0.21              |
|                                                                      | Replication   | 0.43                                           | 0.33          | 0.10              |
| Plasma TNFr1                                                         | Primary       | 0.03                                           | -0.05         | 0.08              |
|                                                                      | Replication   | 0.01                                           | -0.19         | 0.20              |

\*Clinical parameters include age, sex, AKI stage, per-operative albuminuria, pre-operative serum creatinine, discharge serum creatinine. Biomarkers are natural log-transformed.

**Table S9: Risk of CKD Incidence or Progression by Peak Biomarker Level, Primary Cohort**

| <b>Peak blood biomarker<br/>(natural log transformed)</b> | <b>Unadjusted HR (95% CI)</b> | <b>Adjusted HR (95% CI)</b> |
|-----------------------------------------------------------|-------------------------------|-----------------------------|
| bFGF                                                      | 1.55 (1.24, 1.93) *           | 1.58 (1.24, 2.00)*          |
| KIM-1                                                     | 1.53 (1.04, 2.27) *           | 1.34 (0.77, 2.32)           |
| NT pro-BNP                                                | 1.29 (1.04, 1.60) *           | 1.27 (0.96, 1.70)           |
| TNFr1                                                     | 1.81 (1.28, 2.56) *           | 1.81 (1.20, 2.72) *         |
| IL-10                                                     | 1.13 (1.00, 1.29) *           | 1.10 (0.95, 1.26)           |
| IL-2                                                      | 1.21 (1.03, 1.43) *           | 1.11 (0.94, 1.31)           |
| VEGFr1                                                    | 1.30 (1.07, 1.58) *           | 1.20 (0.97, 1.48)           |
| YKL-40                                                    | 2.60 (0.60, 11.18)            | 2.85 (0.59, 13.72)          |

\*  $p < 0.05$

Adjusted for age, sex, AKI stage, pre-operative albuminuria, pre-operative serum creatinine, discharge serum creatinine

**Table S10: Risk of CKD Incidence or Progression by Mean Biomarker Level, Primary Cohort**

| <b>Mean blood biomarker<br/>(natural log transformed)</b> | <b>Unadjusted HR (95% CI)</b> | <b>Adjusted HR (95% CI)</b> |
|-----------------------------------------------------------|-------------------------------|-----------------------------|
| bFGF                                                      | 1.53 (1.20, 1.95)*            | 1.55 (1.20, 2.01) *         |
| KIM-1                                                     | 1.59 (1.12, 2.28) *           | 1.49 (0.88, 2.53)           |
| NT pro-BNP                                                | 1.35 (1.09, 1.67) *           | 1.39 (1.06, 1.83) *         |
| TNFr1                                                     | 2.13 (1.48, 3.09) *           | 2.61 (1.60, 4.28) *         |
| IL-10                                                     | 1.15 (1.00, 1.32) *           | 1.10 (0.94, 1.27)           |
| Il-2                                                      | 1.21 (1.02, 1.45) *           | 1.10 (0.91, 1.32)           |
| VEGFr1                                                    | 1.31 (1.06, 1.62) *           | 1.18 (0.93, 1.49)           |
| YKL-40                                                    | 2.82 (1.37, 5.84) *           | 1.88 (0.88, 4.02)           |

\*  $p < 0.05$

Adjusted for age, sex, AKI stage, pre-operative albuminuria, pre-operative serum creatinine, discharge serum creatinine

**Table S11: Biomarker Measurement Details**

| <b>Sample Type</b> | <b>Biomarker</b> | <b>Biomarker Name</b>                                         | <b>Assay</b>          | <b>Units</b> |
|--------------------|------------------|---------------------------------------------------------------|-----------------------|--------------|
| Blood              | bFGF             | basic fibroblast growth factor                                | MSD (Ang.)            | pg/mL        |
|                    | CK-MB            | creatine kinase-MB                                            | Coulter Access        | ug/L         |
|                    | EGF              | epidermal growth factor                                       | Biochip               | pg/mL        |
|                    | Gal3             | Galectin-3                                                    | MSD(Custom)           | pg/mL        |
|                    | hFABP            | heart-type fatty acid-binding protein                         | Biochip               | pg/mL        |
|                    | hsTnT            | high-sensitivity Troponin T                                   | Coulter Access        | ng/L         |
|                    | IFN              | interferon gamma                                              | MSD (Pro-inf.)        | pg/mL        |
|                    | IL-1             | interleukin 1b                                                | MSD (Custom)          | pg/mL        |
|                    | IL-2             | interleukin 2                                                 | MSD (Pro-inf.)        | pg/mL        |
|                    | IL-4             | interleukin 4                                                 | MSD (Pro-inf.)        | pg/mL        |
|                    | IL-6             | interleukin 6                                                 | MSD (Pro-inf.)        | pg/mL        |
|                    | IL-8             | interleukin 8                                                 | MSD (Pro-inf.)        | pg/mL        |
|                    | IL-10            | interleukin 10                                                | MSD (Pro-inf.)        | pg/mL        |
|                    | IL-12            | interleukin 12                                                | MSD (Pro-inf.)        | pg/mL        |
|                    | IL-13            | interleukin 13                                                | MSD (Pro-inf.)        | pg/mL        |
|                    | IL-18            | interleukin 18                                                | MSD (Custom)          | pg/mL        |
|                    | KIM-1            | kidney injury molecule-1                                      | MSD (Custom)          | pg/mL        |
|                    | MCP-1            | monocyte chemotactic protein 1                                | MSD (Custom)          | pg/mL        |
|                    | NGAL             | neutrophil gelatinase-associated lipocalin                    | Abbott Architect      | pg/mL        |
|                    | NT pro-BNP       | N-terminal prohormone of brain natriuretic peptide            | Coulter Access        | pmol/L       |
|                    | PIGF             | placental Growth Factor                                       | MSD (Ang.)            | pg/mL        |
|                    | ST2              | Soluble suppression of tumorigenicity                         | MSD(Custom)           | pg/mL        |
|                    | Tie2             | angiopoietin-1 receptor                                       | MSD (Ang.)            | pg/mL        |
|                    | TNF-r1           | Tumor necrosis factor receptor 1                              | MSD (Custom)          | pg/mL        |
|                    | TNF-r2           | Tumor necrosis factor receptor 2                              | MSD (Custom)          | pg/mL        |
|                    | TNF $\alpha$     | tumor necrosis factor alpha                                   | MSD (Pro-inf.)        | pg/mL        |
|                    | TnI              | troponin I3                                                   | Coulter Access        | ug/L         |
|                    | VEGF             | vascular endothelial growth factor                            | MSD (Ang.)            | pg/mL        |
|                    | VEGFc            | vascular endothelial growth factor C                          | MSD (Ang.)            | pg/mL        |
|                    | VEGFd            | vascular endothelial growth factor D                          | MSD (Ang.)            | pg/mL        |
|                    | VEGFR1           | anti-angiogenic vascular endothelial growth factor receptor 1 | MSD (Ang.)            |              |
|                    | YKL-40           | chitinase-3-like protein 1                                    | MSD (Custom)          | pg/mL        |
|                    | Urine            | Albumin                                                       | NA                    | ELISA        |
| Creatinine         |                  | NA                                                            | Clinical Autoanalyzer | mg/dL        |
| Cystatin-C         |                  | NA                                                            | Genz. Virotech        | mg/L         |
| IL-18              |                  | interleukin 18                                                | Abbott Architect      | ng/mL        |
| KIM-1              |                  | kidney injury molecule-1                                      | Genz. Virotech        | ng/mL        |
| L-FABP             |                  | liver-type fatty acid-binding protein                         | Genz. Virotech        | ng/mL        |
| NGAL               |                  | neutrophil gelatinase-associated lipocalin                    | Abbott Architect      | ng/mL        |

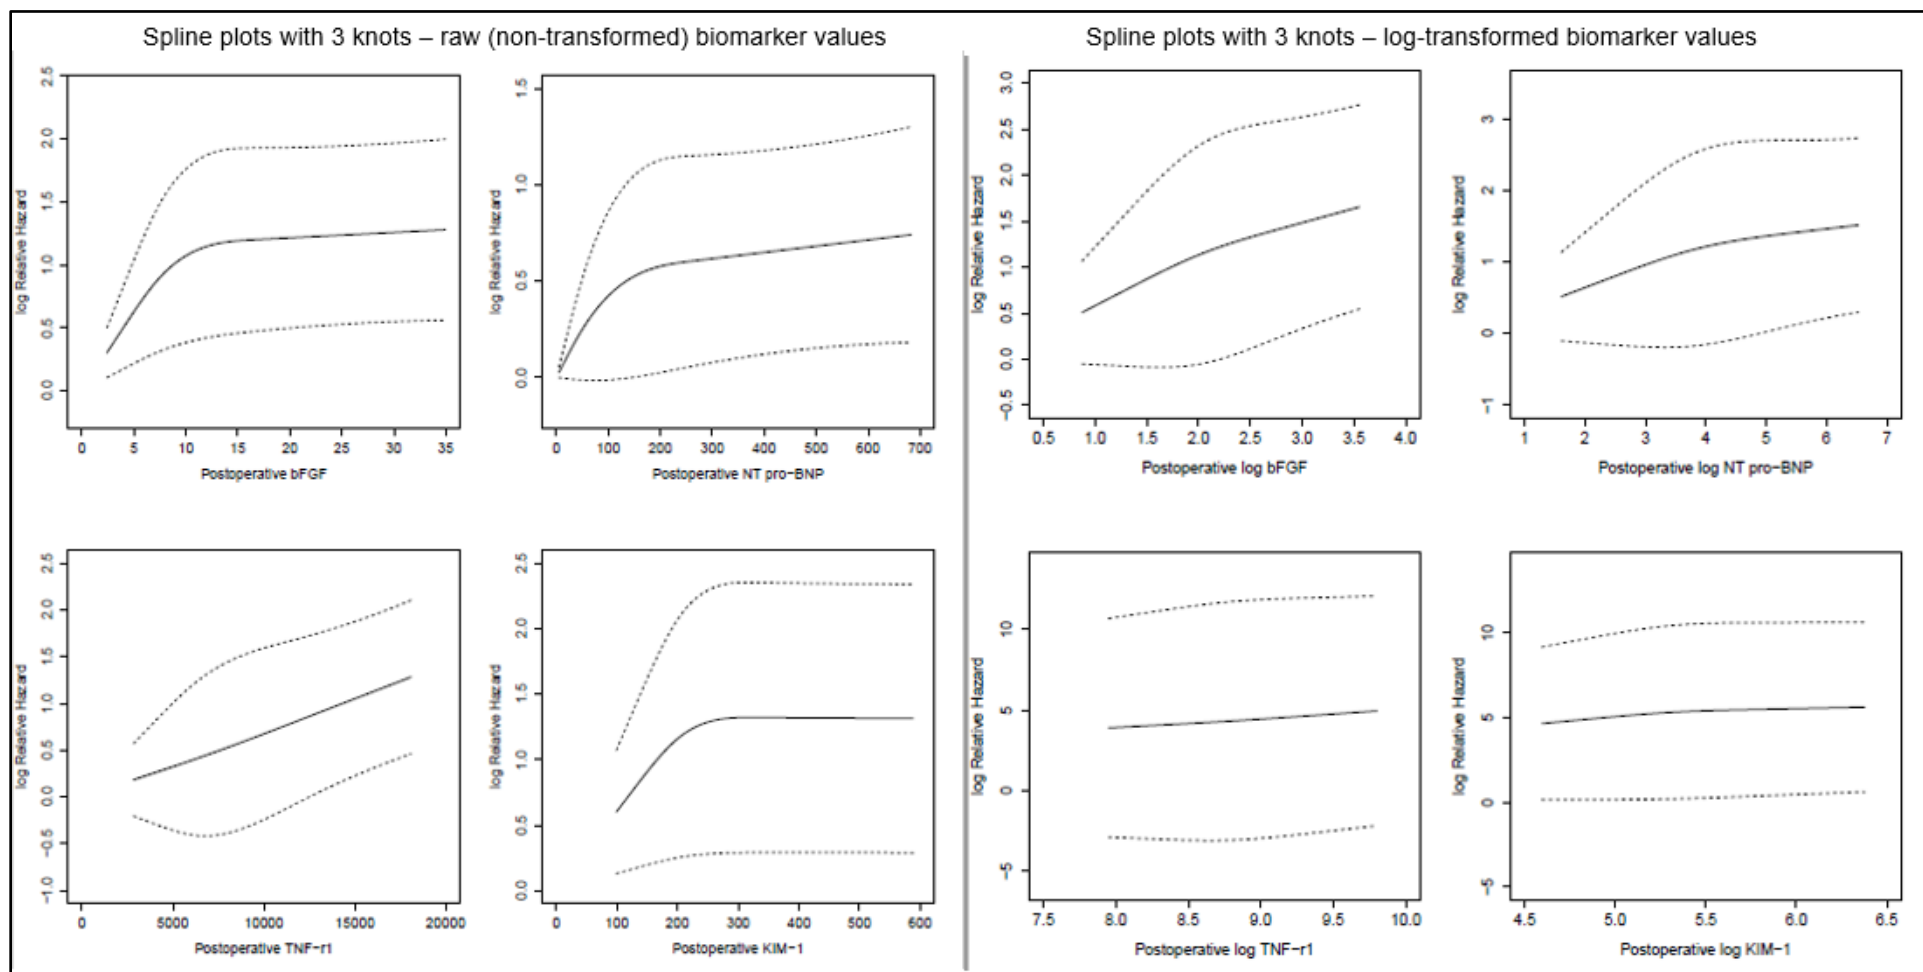

Figure S1: Post-operative biomarker spline plots using 3 cubic spline knots
